# Supplementary material for: Towards full-color-tunable emission of two component Eu(iii)-doped Gd(iii) coordination frameworks by the variation of excitation light
Source: Royal Society of Chemistry journal article supplement (doi:10.1039/c4dt00837e), 2014-01-01
Supplement: c4dt00837e1.pdf [file c4dt00837e1.pdf]

## Supporting Information

### Towards full-color-tunable emission of two component Eu(III)-doped Gd(III) coordination frameworks by variation of excitation light

Fengming Zhang,<sup>ab</sup> Pengfei Yan,<sup>\*a</sup> Hongfeng Li,<sup>a</sup> Xiaoyan Zou,<sup>a</sup> Guangfeng Hou,<sup>a</sup> and Guangming Li<sup>\*a</sup>

<sup>a</sup> Key Laboratory of Functional Inorganic Material Chemistry (MOE); School of Chemistry and Materials Science, Heilongjiang University, Harbin 150080, P. R. China. Fax: (+86) 451 8667 3647, E-mail: gmli\_2000@163.com.

<sup>b</sup> Harbin University of Science and Technology, Harbin 150080, P. R. China.

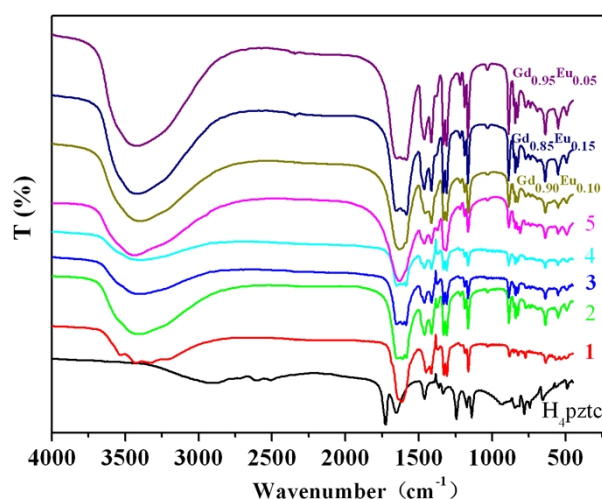

**Fig. S1** Infrared spectra of H<sub>4</sub>pztc, complexes 1–5 and Eu(III)-doped Gd(III) complexes.

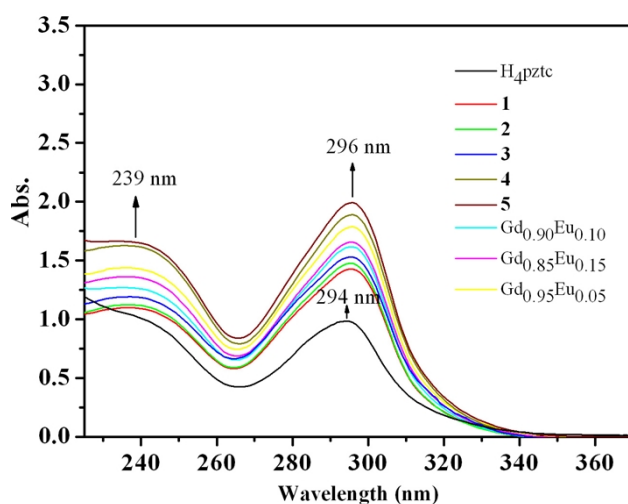

**Fig. S2** UV-vis spectra for H<sub>4</sub>pztc, complexes 1–5 and Eu(III)-doped Gd(III) complexes in aqueous solution.

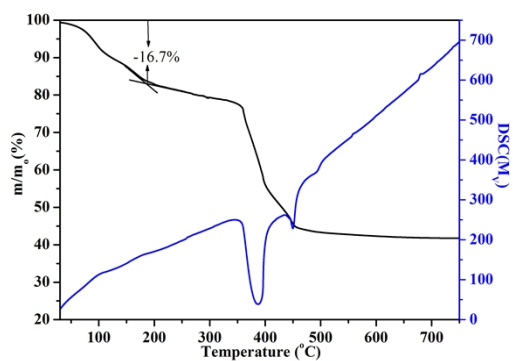

**Fig. S3** TG–DSC curves of complex 1.

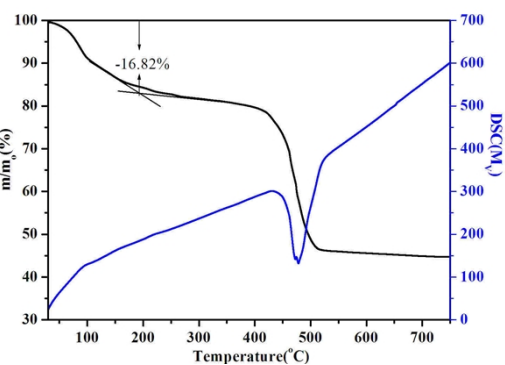

**Fig. S4** TG–DSC curves of complex 2.

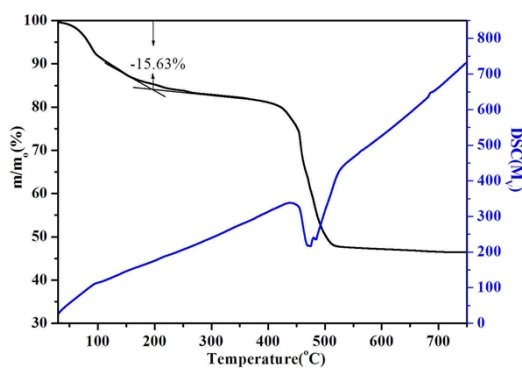

**Fig. S5** TG–DSC curves of complex 3.

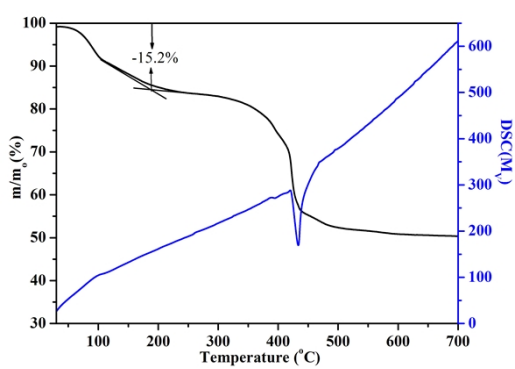

**Fig. S6** TG–DSC curves of complex 4.

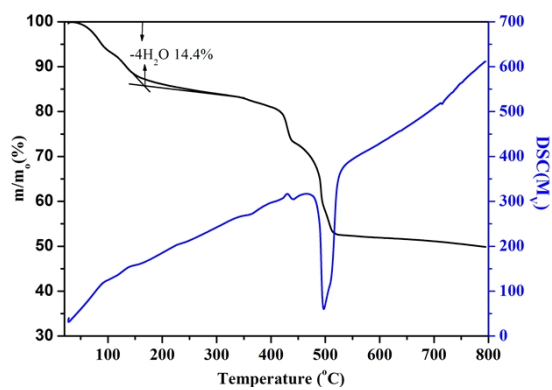

**Fig. S7** TG–DSC curves of complex 5.

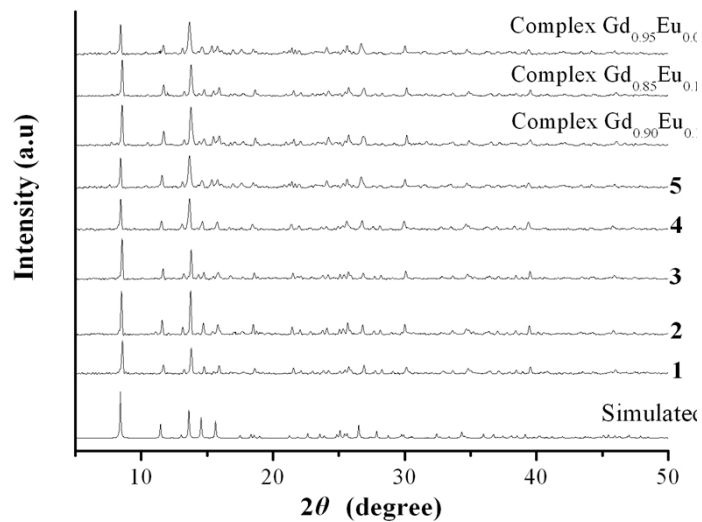

**Fig. S8** Experimental X-ray powder patterns for microcrystalline samples **1–5**, Eu(III)-doped Gd(III) complexes and simulated pattern.

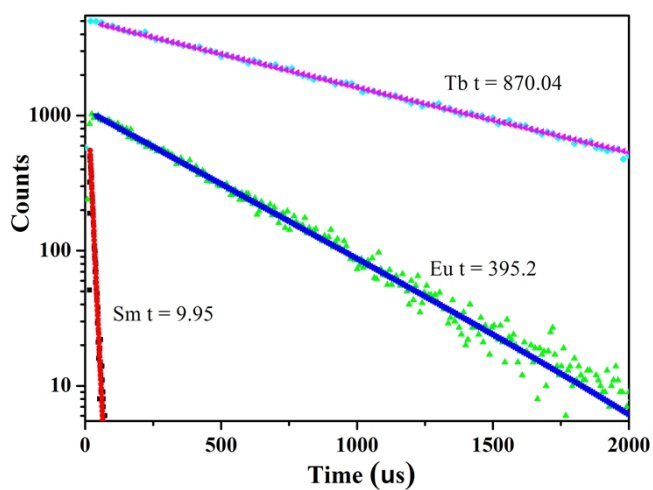

**Fig. S9** Luminescence decay profiles for complexes **2**, **3**, and **5**.

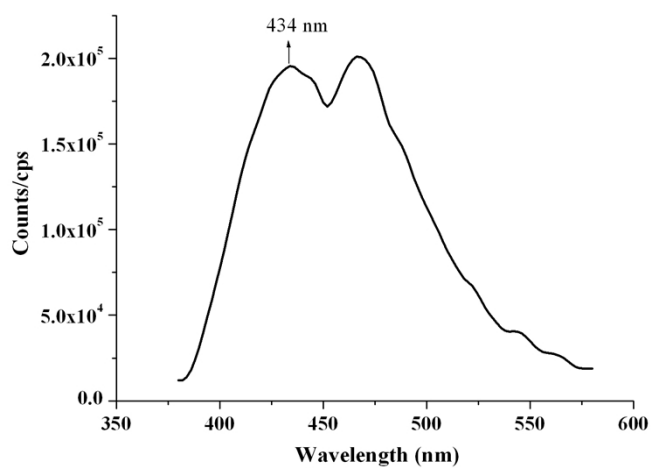

**Fig. S10** Phosphorescence spectrum of **4** at 77K

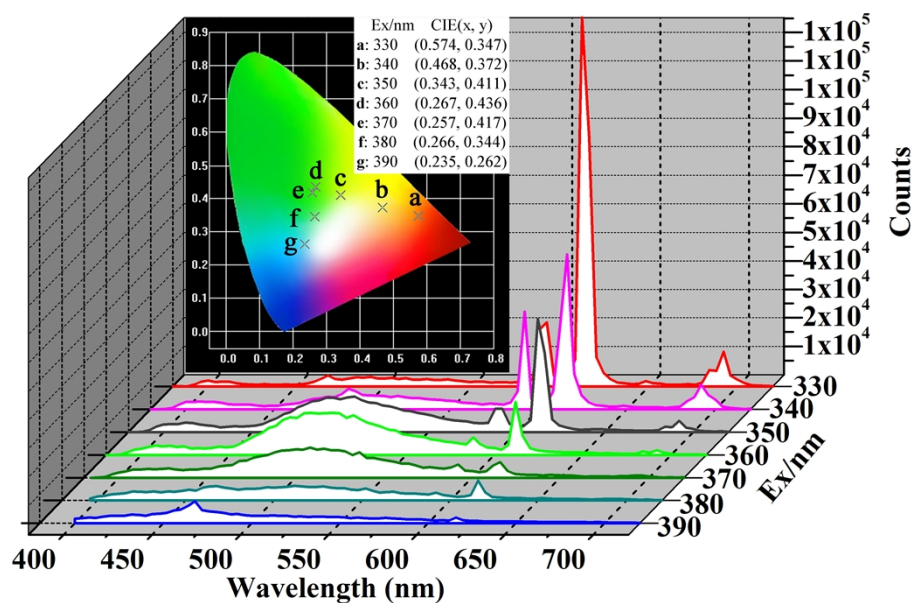

**Fig. S11** Solid-state emission spectra of complex  $Gd_{0.85}Eu_{0.15}$  with excitation wavelengths varying from 330 to 390 nm. Insert: CIE chromaticity diagram and color coordinates of the complex  $Gd_{0.85}Eu_{0.15}$  under excitation wavelengths from 330 to 390 nm.

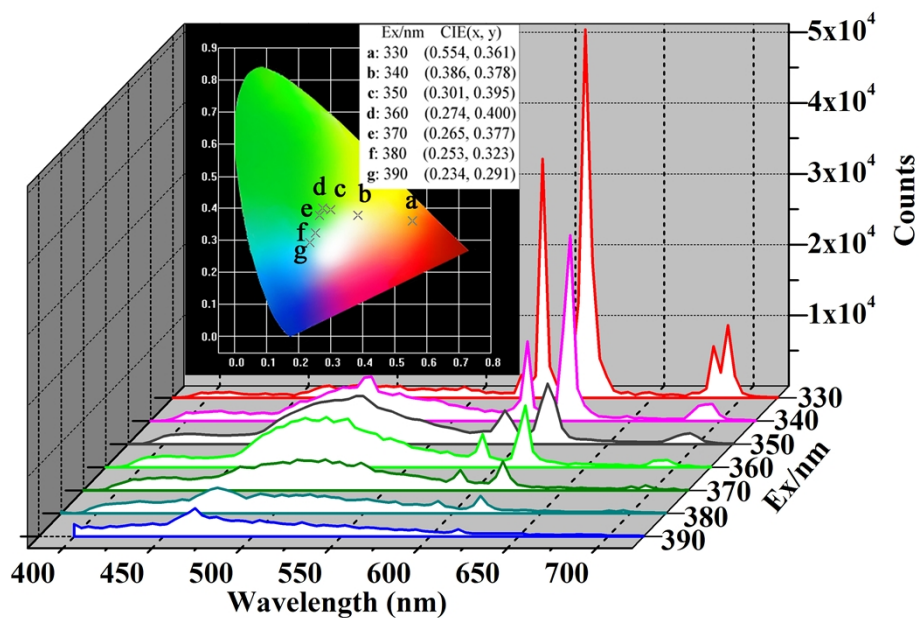

**Fig. S12** Solid-state emission spectra of complex  $Gd_{0.95}Eu_{0.05}$  with excitation wavelengths varying from 330 to 390 nm. Insert: CIE chromaticity diagram and color coordinates of the complex  $Gd_{0.95}Eu_{0.05}$  under excitation wavelengths from 330 to 390 nm.

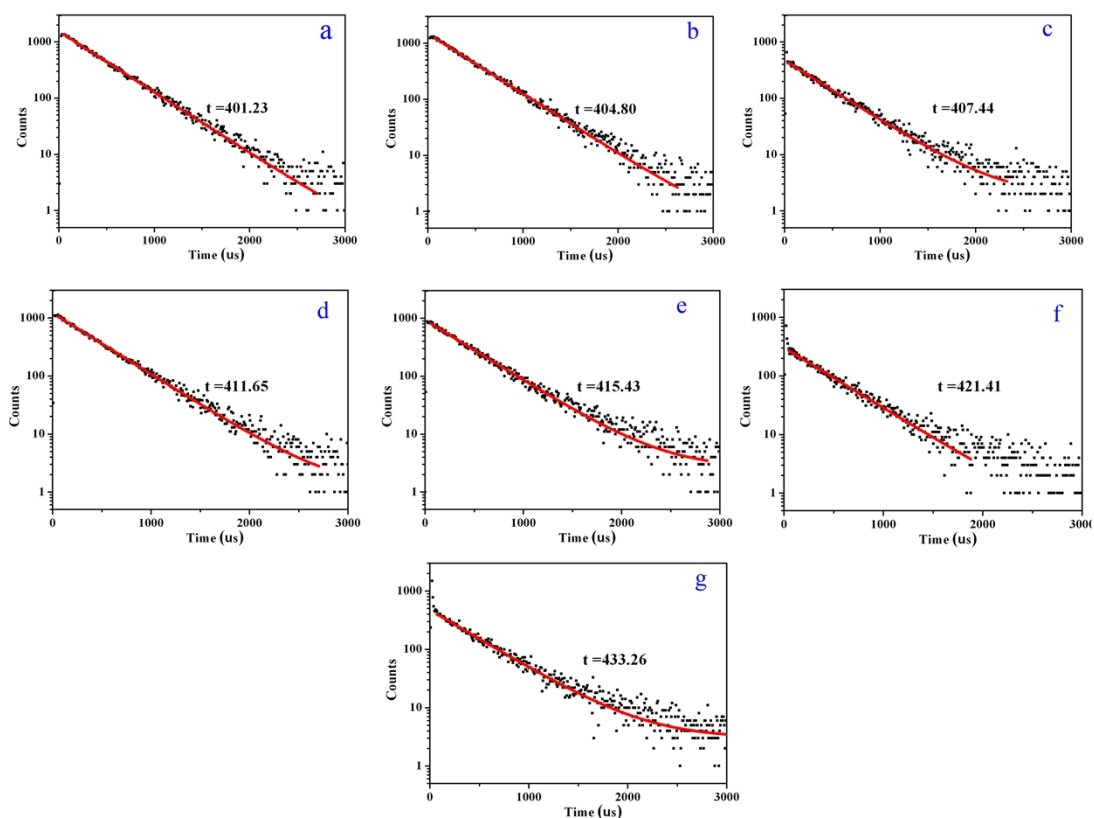

**Fig. S13** Luminescence decay profiles for Gd<sub>0.90</sub>Eu<sub>0.10</sub> material from 330 to 390 nm (a–g, step size 10 nm).

**Table S1** Crystal data and structure refinement for complexes 1–5

| Complexes                                             | 1                                                                 | 2                                                                 | 3                                                                 | 4                                                                 | 5                                                                 |
|-------------------------------------------------------|-------------------------------------------------------------------|-------------------------------------------------------------------|-------------------------------------------------------------------|-------------------------------------------------------------------|-------------------------------------------------------------------|
| Formula                                               | C <sub>8</sub> N <sub>2</sub> H <sub>8</sub> O <sub>12</sub> NaCe | C <sub>8</sub> N <sub>2</sub> H <sub>8</sub> O <sub>12</sub> NaSm | C <sub>8</sub> N <sub>2</sub> H <sub>8</sub> O <sub>12</sub> NaEu | C <sub>8</sub> N <sub>2</sub> H <sub>8</sub> O <sub>12</sub> NaGd | C <sub>8</sub> N <sub>2</sub> H <sub>8</sub> O <sub>12</sub> NaTb |
| M/g mol <sup>-1</sup>                                 | 487.27                                                            | 497.51                                                            | 499.11                                                            | 504.40                                                            | 506.08                                                            |
| Color                                                 | Colourless                                                        | Colourless                                                        | Colourless                                                        | Colourless                                                        | Colourless                                                        |
| Crystal system                                        | Orthorhombic                                                      | Orthorhombic                                                      | Orthorhombic                                                      | Orthorhombic                                                      | Orthorhombic                                                      |
| Space group                                           | <i>Pnma</i>                                                       | <i>Pnma</i>                                                       | <i>Pnma</i>                                                       | <i>Pnma</i>                                                       | <i>Pnma</i>                                                       |
| <i>a</i> (Å)                                          | 15.414(3)                                                         | 15.569(3)                                                         | 15.306(3)                                                         | 15.251(3)                                                         | 15.147(3)                                                         |
| <i>b</i> (Å)                                          | 6.7180(13)                                                        | 6.8533(13)                                                        | 6.7260(13)                                                        | 6.6990(13)                                                        | 6.6763(13)                                                        |
| <i>c</i> (Å)                                          | 14.322(3)                                                         | 14.397(3)                                                         | 14.386(3)                                                         | 14.382(3)                                                         | 14.375(3)                                                         |
| <i>V</i> (Å <sup>3</sup> )                            | 1483.1(5)                                                         | 1536.1(5)                                                         | 1481.0(5)                                                         | 1469.4(5)                                                         | 1453.7(5)                                                         |
| <i>Z</i>                                              | 4                                                                 | 4                                                                 | 4                                                                 | 4                                                                 | 4                                                                 |
| D <sub>calcd</sub> /g cm <sup>-3</sup>                | 2.182                                                             | 2.151                                                             | 2.238                                                             | 2.280                                                             | 2.312                                                             |
| $\mu$ (mm <sup>-1</sup> )                             | 3.167                                                             | 3.917                                                             | 4.333                                                             | 4.612                                                             | 4.965                                                             |
| <i>F</i> (000)                                        | 940                                                               | 956                                                               | 960                                                               | 964                                                               | 968                                                               |
| <i>R</i> <sub>1</sub> [ <i>I</i> > 2σ( <i>I</i> )]    | 0.0693                                                            | 0.0653                                                            | 0.0695                                                            | 0.0812                                                            | 0.0700                                                            |
| <i>wR</i> <sub>2</sub> , [ <i>I</i> > 2σ( <i>I</i> )] | 0.1897                                                            | 0.1780                                                            | 0.1746                                                            | 0.2114                                                            | 0.1721                                                            |
| <i>R</i> <sub>1</sub> , (all data)                    | 0.0749                                                            | 0.0707                                                            | 0.0809                                                            | 0.0922                                                            | 0.0774                                                            |
| <i>wR</i> <sub>2</sub> , (all data)                   | 0.1954                                                            | 0.1819                                                            | 0.1856                                                            | 0.2219                                                            | 0.1786                                                            |
| GOF on <i>F</i> <sup>2</sup>                          | 1.074                                                             | 1.119                                                             | 0.980                                                             | 1.091                                                             | 1.074                                                             |

**Table S2** Bond lengths (Å) and angles (deg) for complex 1

|                     |           |                     |           |
|---------------------|-----------|---------------------|-----------|
| Ce(1)-O(3)#1        | 2.414(9)  | Ce(1)-O(3)#2        | 2.414(9)  |
| Ce(1)-O(1)          | 2.417(11) | Ce(1)-O(6)          | 2.430(16) |
| Ce(1)-O(8)#3        | 2.440(18) | Ce(1)-O(8)          | 2.440(18) |
| Ce(1)-N(1)          | 2.549(11) | Ce(1)-O(4)#4        | 2.572(9)  |
| Ce(1)-O(4)#5        | 2.572(9)  |                     |           |
| N(1)-Ce(1)-O(4)#4   | 133.0(4)  | O(3)#1-Ce(1)-O(6)   | 73.5(3)   |
| O(1)-Ce(1)-N(1)     | 63.5(3)   | O(3)#1-Ce(1)-O(8)   | 147.8(6)  |
| O(1)-Ce(1)-O(4)#4   | 146.4(4)  | O(3)#1-Ce(1)-O(8)#3 | 70.6(6)   |
| O(1)-Ce(1)-O(6)     | 126.3(4)  | O(3)#2-Ce(1)-O(4)#4 | 121.4(3)  |
| O(1)-Ce(1)-O(8)     | 75.0(5)   | O(4)#4-Ce(1)-O(4)#5 | 51.1(4)   |
| O(3)#1-Ce(1)-N(1)   | 71.9(3)   | O(6)-Ce(1)-N(1)     | 62.7(4)   |
| O(3)#1-Ce(1)-O(1)   | 90.3(2)   | O(6)-Ce(1)-O(4)#4   | 77.7(5)   |
| O(3)#1-Ce(1)-O(3)#2 | 139.1(6)  | O(6)-Ce(1)-O(8)     | 138.1(5)  |
| O(3)#1-Ce(1)-O(4)#4 | 73.3(3)   | O(8)#3-Ce(1)-O(8)   | 77.9(10)  |
| O(8)-Ce(1)-O(4)#4   | 103.4(6)  | O(8)-Ce(1)-N(1)     | 122.8(5)  |
| O(8)-Ce(1)-O(4)#5   | 71.9(6)   |                     |           |

Symmetry transformations used to generate equivalent atoms: #1:  $-x, y + 1/2, -z + 1$ ; #2:  $-x, -y - 1, -z + 1$ ; #3:  $x, -y - 1/2, z$ ; #4:  $x - 1/2, -y - 1/2, -z + 3/2$ ; #5:  $x - 1/2, y, -z + 3/2$ .

**Table S3** Bond lengths (Å) and angles (deg) for complex 2

|                     |           |                     |           |
|---------------------|-----------|---------------------|-----------|
| Sm(1)-O(3)#1        | 2.468(7)  | Sm(1)-O(8)          | 2.529(15) |
| Sm(1)-O(3)#2        | 2.468(7)  | Sm(1)-O(4)#4        | 2.614(7)  |
| Sm(1)-O(1)          | 2.474(9)  | Sm(1)-O(4)#5        | 2.614(7)  |
| Sm(1)-O(6)          | 2.514(14) | Sm(1)-N(1)          | 2.620(8)  |
| Sm(1)-O(8)#3        | 2.529(15) |                     |           |
| O(8)-Sm(1)-O(4)#4   | 102.9(5)  | O(1)-Sm(1)-N(1)     | 62.0(3)   |
| O(3)#1-Sm(1)-O(4)#4 | 120.3(3)  | O(3)#1-Sm(1)-O(8)   | 71.0(5)   |
| O(1)-Sm(1)-O(6)     | 122.8(3)  | O(3)#1-Sm(1)-N(1)   | 72.48(19) |
| O(8)-Sm(1)-N(1)     | 124.0(5)  | O(8)-Sm(1)-O(4)#5   | 73.3(6)   |
| O(4)#4-Sm(1)-N(1)   | 132.1(3)  | O(3)#1-Sm(1)-O(4)#5 | 73.7(2)   |
| O(6)-Sm(1)-O(8)     | 139.5(5)  | O(3)#1-Sm(1)-O(6)   | 74.0(3)   |
| O(3)#1-Sm(1)-O(3)#2 | 140.8(5)  | O(8)#3-Sm(1)-O(8)   | 75.5(9)   |
| O(3)#1-Sm(1)-O(8)#3 | 145.9(5)  | O(1)-Sm(1)-O(8)     | 76.7(5)   |
| O(1)-Sm(1)-O(4)#4   | 149.0(3)  | O(6)-Sm(1)-O(4)#4   | 77.9(4)   |
| O(4)#4-Sm(1)-O(4)#5 | 49.3(4)   | O(3)#1-Sm(1)-O(1)   | 89.38(18) |
| O(6)-Sm(1)-N(1)     | 60.9(3)   |                     |           |

Symmetry transformations used to generate equivalent atoms: #1:  $-x, y + 1/2, -z + 1$ ; #2:  $-x, -y - 1, -z + 1$ ; #3:  $x, -y - 1/2, z$ ; #4:  $x - 1/2, -y - 1/2, -z + 3/2$ ; #5:  $x - 1/2, y, -z + 3/2$ .

**Table S4** Bond lengths (Å) and angles (deg) for complex **3**

|                     |           |                     |           |
|---------------------|-----------|---------------------|-----------|
| Eu(1)-O(1)          | 2.393(11) | Eu(1)-O(3)#1        | 2.406(9)  |
| Eu(1)-O(3)#2        | 2.406(9)  | Eu(1)-O(6)          | 2.415(18) |
| Eu(1)-O(8)#3        | 2.45(2)   | Eu(1)-O(8)          | 2.45(2)   |
| Eu(1)-N(1)          | 2.552(11) | Eu(1)-O(4)#4        | 2.563(10) |
| Eu(1)-O(4)#5        | 2.563(10) |                     |           |
| O(8)-Eu(1)-O(4)#5   | 103.4(7)  | O(1)-Eu(1)-N(1)     | 63.7(3)   |
| O(3)#1-Eu(1)-O(4)#5 | 121.5(4)  | O(3)#1-Eu(1)-O(8)   | 70.3(7)   |
| O(8)-Eu(1)-N(1)     | 123.8(6)  | O(8)-Eu(1)-O(4)#4   | 72.1(7)   |
| O(1)-Eu(1)-O(6)     | 127.2(4)  | O(3)#1-Eu(1)-N(1)   | 72.3(3)   |
| N(1)-Eu(1)-O(4)#4   | 131.9(4)  | O(3)#1-Eu(1)-O(4)#4 | 73.0(3)   |
| O(6)-Eu(1)-O(8)     | 137.9(7)  | O(3)#1-Eu(1)-O(6)   | 74.6(4)   |
| O(3)#1-Eu(1)-O(3)#2 | 140.7(7)  | O(1)-Eu(1)-O(8)     | 75.7(7)   |
| O(3)#1-Eu(1)-O(8)#3 | 146.5(8)  | O(6)-Eu(1)-O(4)#4   | 75.8(5)   |
| O(1)-Eu(1)-O(4)#4   | 147.0(3)  | O(8)#3-Eu(1)-O(8)   | 76.9(13)  |
| O(4)#4-Eu(1)-O(4)#5 | 51.3(5)   | O(1)-Eu(1)-O(3)#1   | 89.7(3)   |
| O(6)-Eu(1)-N(1)     | 63.5(4)   |                     |           |

Symmetry transformations used to generate equivalent atoms: #1:  $-x, y + 1/2, -z + 1$ ; #2:  $-x, -y - 1, -z + 1$ ; #3:  $x, -y - 1/2, z$ ; #4:  $x - 1/2, y, -z + 3/2$ ; #5:  $x - 1/2, -y - 1/2, -z + 3/2$ .

**Table S5** Bond lengths (Å) and angles (deg) for complex **4**

|                     |           |                     |           |
|---------------------|-----------|---------------------|-----------|
| Gd(1)-O(1)          | 2.385(15) | Gd(1)-O(8)          | 2.43(3)   |
| Gd(1)-O(6)          | 2.39(2)   | Gd(1)-N(1)          | 2.533(13) |
| Gd(1)-O(3)#1        | 2.395(11) | Gd(1)-O(4)#4        | 2.558(12) |
| Gd(1)-O(3)#2        | 2.395(11) | Gd(1)-O(4)#5        | 2.558(12) |
| Gd(1)-O(8)#3        | 2.43(3)   |                     |           |
| O(8)-Gd(1)-O(4)#4   | 103.1(7)  | O(1)-Gd(1)-N(1)     | 63.8(4)   |
| O(3)#1-Gd(1)-O(4)#4 | 122.1(4)  | O(3)#1-Gd(1)-O(8)   | 71.0(8)   |
| O(8)-Gd(1)-N(1)     | 123.9(7)  | O(8)-Gd(1)-O(4)#5   | 71.6(7)   |
| O(1)-Gd(1)-O(6)     | 127.1(6)  | O(3)#1-Gd(1)-N(1)   | 71.7(3)   |
| N(1)-Gd(1)-O(4)#4   | 132.1(4)  | O(3)#1-Gd(1)-O(4)#5 | 73.3(4)   |
| O(6)-Gd(1)-O(8)     | 137.9(8)  | O(6)-Gd(1)-O(3)#1   | 74.2(4)   |
| O(3)#1-Gd(1)-O(3)#2 | 139.4(7)  | O(1)-Gd(1)-O(8)     | 75.7(7)   |
| O(1)-Gd(1)-O(4)#4   | 146.5(4)  | O(6)-Gd(1)-O(4)#4   | 76.4(6)   |
| O(3)#2-Gd(1)-O(8)   | 147.1(9)  | O(8)#3-Gd(1)-O(8)   | 76.8(15)  |
| O(4)#4-Gd(1)-O(4)#5 | 51.8(6)   | O(1)-Gd(1)-O(3)#1   | 89.6(3)   |
| O(6)-Gd(1)-N(1)     | 63.4(5)   |                     |           |

Symmetry transformations used to generate equivalent atoms: #1:  $-x, y + 1/2, -z + 1$ ; #2:  $-x, -y - 1, -z + 1$ ; #3:  $x, -y - 1/2, z$ ; #4:  $x - 1/2, -y - 1/2, -z + 3/2$ ; #5:  $x - 1/2, y, -z + 3/2$ .

**Table S6** Bond lengths (Å) and angles (deg) for complex **5**

|                     |           |                     |           |
|---------------------|-----------|---------------------|-----------|
| Tb(1)-O(1)          | 2.366(13) | Tb(1)-O(3)#1        | 2.377(10) |
| Tb(1)-O(3)#2        | 2.377(10) | Tb(1)-O(6)          | 2.387(19) |
| Tb(1)-O(8)#3        | 2.40(2)   | Tb(1)-O(8)          | 2.40(2)   |
| Tb(1)-N(1)          | 2.517(12) | Tb(1)-O(4)#4        | 2.538(11) |
| Tb(1)-O(4)#5        | 2.538(11) |                     |           |
| O(8)-Tb(1)-O(4)#4   | 101.5(7)  | O(1)-Tb(1)-N(1)     | 64.1(4)   |
| O(3)#1-Tb(1)-O(4)#4 | 122.1(4)  | O(8)-Tb(1)-O(4)#5   | 70.1(7)   |
| O(8)-Tb(1)-N(1)     | 125.3(6)  | O(3)#1-Tb(1)-O(8)   | 71.2(7)   |
| O(1)-Tb(1)-O(6)     | 128.0(5)  | O(3)#1-Tb(1)-N(1)   | 71.9(3)   |
| N(1)-Tb(1)-O(4)#4   | 132.3(4)  | O(3)#1-Tb(1)-O(4)#5 | 73.2(4)   |
| O(6)-Tb(1)-O(8)     | 137.1(7)  | O(3)#1-Tb(1)-O(6)   | 74.4(3)   |
| O(3)#1-Tb(1)-O(3)#2 | 139.8(6)  | O(6)-Tb(1)-O(4)#4   | 76.1(5)   |
| O(1)-Tb(1)-O(4)#4   | 146.2(4)  | O(8)#3-Tb(1)-O(8)   | 76.3(13)  |
| O(3)#1-Tb(1)-O(8)#3 | 147.0(8)  | O(1)-Tb(1)-O(8)     | 76.8(6)   |
| O(4)#4-Tb(1)-O(4)#5 | 51.8(5)   | O(1)-Tb(1)-O(3)#1   | 89.9(3)   |
| O(6)-Tb(1)-N(1)     | 63.9(5)   |                     |           |

Symmetry transformations used to generate equivalent atoms: #1:  $-x, y + 1/2, -z + 1$ ; #2:  $-x, -y - 1, -z + 1$ ; #3:  $x, -y - 1/2, z$ ; #4:  $x - 1/2, -y - 1/2, -z + 3/2$ ; #5:  $x - 1/2, y, -z + 3/2$ .
